# Supplementary material for: Evaluation of the peer teaching program at the University children´s hospital Essen – a single center experience
Source: PubMed Central journal article supplement — GMS Z Med Ausbild. 2013 May 15;30(2):Doc25. doi: 10.3205/zma000868 (PMC3671321; doi:10.3205/zma000868), 2013-05-15
Supplement: ZMA-30-25-s-001.pdf [file ZMA-30-25-s-001.pdf]

## Neurological examination of a newborn

You examine a newborn (40th gestational week) on the ward. The baby's mother is not fluent in German and is sitting beside the child

### **Exercise 1:**

Please start taking the patient's history and explain the mother the examination.

### **Exercise 2:**

Please demonstrate the measurement of the head circumference and palpation of the pulses.

### **Exercise 3:**

Please demonstrate a brief structured neurological examination of the child.

### **Exercise 4:**

a) Transfer the results of your examination into a brief medical report.

b) What are required preparations for paediatricians and nurses before starting the examination of a newborn?

# Examination of a newborn Checklist for senior lecturers

**Please do not pass this checklist to any unauthorized  
personal!**

|                 |            |
|-----------------|------------|
| Examiner:       | signature: |
| Deputy:         |            |
| name of student |            |

|                                                                                                                                                                                                                                 |
|---------------------------------------------------------------------------------------------------------------------------------------------------------------------------------------------------------------------------------|
| <p><b>Please literally read out the exercises to the student :</b></p> <p><b><i>You examin a newborn (40th gestational week) on the ward. The baby's mother is not fluent in German and is sitting beside the child</i></b></p> |
|---------------------------------------------------------------------------------------------------------------------------------------------------------------------------------------------------------------------------------|

| <b>Exercise 1: Please start taking the patient's history and explain the mother the examination.</b>                                                                                                                                                                                                                                                           | <b>Points (max. 5)</b> |
|----------------------------------------------------------------------------------------------------------------------------------------------------------------------------------------------------------------------------------------------------------------------------------------------------------------------------------------------------------------|------------------------|
| <ul style="list-style-type: none"> <li>&gt; Welcoming the mother, ask for name <b>(1 Point)</b></li> <li>&gt; introducing oneself<b>(1 Point)</b></li> <li>&gt; clarity of articulation (volume, clarity) <b>(1 Point)</b></li> <li>&gt; Attitude (eye contact; smiling) <b>(1 Point)</b></li> <li>&gt; Explanation of examination <b>(1 Point)</b></li> </ul> |                        |

| <b>Exercise 2: Please demonstrate the measurement of the head circumference and palpation of the pulses.</b>                                                                                                                                                                                                                                                                                                                                                                                                                       | <b>Points (max. 6)</b> |
|------------------------------------------------------------------------------------------------------------------------------------------------------------------------------------------------------------------------------------------------------------------------------------------------------------------------------------------------------------------------------------------------------------------------------------------------------------------------------------------------------------------------------------|------------------------|
| <p><b>Measurement of head circumference:</b></p> <ul style="list-style-type: none"> <li>&gt; complete undressing of the child (take off cap) <b>(1 Point)</b></li> <li>&gt; „correct“ measurement of head circumference <b>(1 Point)</b></li> <li>&gt; Result marked in percentile sheet <b>(1 Point)</b></li> </ul> <p><b>Palpation of the pulses:</b></p> <ul style="list-style-type: none"> <li>&gt; brachialis <b>(1 Point)</b></li> <li>&gt; femoralis <b>(1 Point)</b></li> <li>&gt; feet pulses <b>(1 Point)</b></li> </ul> |                        |
| <p><b>Be aware :</b> <i>Infant doll is wearing socks, cap and diapers upon examination; Student has to advise the mother that the baby has to be undressed completely.</i></p>                                                                                                                                                                                                                                                                                                                                                     |                        |

| <b>Exercise 3: Please demonstrate a brief structured neurological examination of the child.</b>                                                                                                                                                                                                                                                                                                                               | <b>Points (max.16)</b> |
|-------------------------------------------------------------------------------------------------------------------------------------------------------------------------------------------------------------------------------------------------------------------------------------------------------------------------------------------------------------------------------------------------------------------------------|------------------------|
| <p><b>Neurological Examination:</b></p> <ul style="list-style-type: none"> <li>&gt; Palpation of major fontanella <b>(1 Point)</b></li> <li>&gt; Observe spontaneous activity <b>(1 Point)</b></li> <li>&gt; Observe muscular tone (e.g.normo-, hypo, hypertensive, floppy baby,) <b>(1 Point)</b></li> <li>&gt; Observe head motility <b>(1 Point)</b></li> <li>&gt; primitive muscular reflexes <b>(1 Point)</b></li> </ul> |                        |

|                                                                                                                                                                                                                                                                                                                                                                                                                                                                                                       |  |
|-------------------------------------------------------------------------------------------------------------------------------------------------------------------------------------------------------------------------------------------------------------------------------------------------------------------------------------------------------------------------------------------------------------------------------------------------------------------------------------------------------|--|
| <ul style="list-style-type: none"> <li>&gt; Babinski reflex (1 Point)</li> <li>&gt; sucking reflex (1 Point)</li> <li>&gt; palmar reflex (1 Point)</li> <li>&gt; plantar reflex (1 Point)</li> <li>&gt; Moro reaction(1 Point)</li> <li>&gt; walking phenomenon(1 Point)</li> <li>&gt; Galant reflex (1 Point)</li> <li>&gt; Landau reaction (1 Point)</li> <li>&gt; turn around (1 Point)</li> <li>&gt; hear screening by clapping hands (1 Point)</li> <li>&gt; light reaction (1 Point)</li> </ul> |  |
|                                                                                                                                                                                                                                                                                                                                                                                                                                                                                                       |  |

|                                                                                                                                                                                                                                                                                                                                                                                                                                                                                                                                                                                                                                                                                                                                                                       |                         |
|-----------------------------------------------------------------------------------------------------------------------------------------------------------------------------------------------------------------------------------------------------------------------------------------------------------------------------------------------------------------------------------------------------------------------------------------------------------------------------------------------------------------------------------------------------------------------------------------------------------------------------------------------------------------------------------------------------------------------------------------------------------------------|-------------------------|
| <b>Exercise 4:</b>                                                                                                                                                                                                                                                                                                                                                                                                                                                                                                                                                                                                                                                                                                                                                    | <b>Points (max. 11)</b> |
| <p><b>a) Transfer the results of your examination into a brief medical report.</b></p> <p><b>b) What are required preparations for paediatricians and nurses before starting the examination of a newborn?</b></p>                                                                                                                                                                                                                                                                                                                                                                                                                                                                                                                                                    |                         |
| <p><b>a) Medical report:</b></p> <ul style="list-style-type: none"> <li>&gt; <i>eutrophic newborn in good condition and good nutritional status (1 Point)</i></li> <li>&gt; Head circumference on 50<sup>th</sup> percentile (1 Point)</li> <li>&gt; <i>inconspicuous palpation of all pulses (1 Point)</i></li> <li>&gt; <i>inconspicuous oriented neurological examination (normal spontaneous activity, muscular tone and primitive reflexes) (3 Points)</i></li> </ul> <p><b>b) Preparation:</b></p> <ul style="list-style-type: none"> <li>&gt; heater on (1 Point)&gt; clean mat (1 Point) Examine the child awake, in a quiet surrounding following a meal (1 Point)</li> <li>&gt; Stethoscope pre-warmed (1 Point)&gt; hand disinfection (1 Point)</li> </ul> |                         |
| <p><b>Be aware: Upon neurological examination emphasis is laid on spontaneous activity, muscular tone and primitive reflexes. It's not enough just to mention „...inconspicuous neurological examination“.</b></p>                                                                                                                                                                                                                                                                                                                                                                                                                                                                                                                                                    |                         |

A maximum of 38 points can be reached!

total points:

Time: 10 minutes
